# Supplementary material for: Cd(ii)-terpyridine-based complex as a ratiometric fluorescent probe for pyrophosphate detection in solution and as an imaging agent in living cells
Source: Royal Society of Chemistry journal article supplement (doi:10.1039/c4dt03022b), 2014-11-19
Supplement: c4dt03022b1.pdf [file c4dt03022b1.pdf]

*Supporting Information*

**Cd(II)-Terpyridine-based complex as a ratiometric  
fluorescent probe for pyrophosphate detection in  
solution and as an imaging agent in living cells**

**Shu-Yan Jiao, Kun Li\*, Wei Zhang, Yan-Hong Liu, Zeng Huang and Xiao-Qi Yu\***

Key Laboratory of Green Chemistry and Technology (Ministry of Education), College  
of Chemistry, Sichuan University  
No.29 Wangjiang Road, Chengdu, P. R. of China 610064  
Fax: (+86 28 85415886)  
E-mail: kli@scu.edu.cn; xqyu@scu.edu.cn

**Contents**

|                                                                                        |    |
|----------------------------------------------------------------------------------------|----|
| Figure S1. Fluorescence response of <b>L1</b> towards metal ions in CH <sub>3</sub> CN | 2  |
| Figure S2. Mass spectrometry (HRMS) of <b>L1-Cd(II)</b> complex                        | 3  |
| Figure S3. Absorption spectra of <b>L1</b> titration of Cd <sup>2+</sup>               | 3  |
| Figure S4. The determination <b>L1-Cd(II)</b> of the detection limit (LOD) for PPI     | 4  |
| Figure S5. Mass spectral analysis for <b>L1-Cd(II)</b> interaction with PPI            | 5  |
| Figure S6. Absorption spectra of <b>L1</b> , and <b>L1-Cd(II)</b> complex with PPI     | 6  |
| Figure S7. <sup>1</sup> H NMR spectra of <b>L1</b>                                     | 7  |
| Figure S8. <sup>13</sup> C NMR spectra of <b>L1</b>                                    | 8  |
| Figure S9. Mass spectrometry (HRMS) of <b>L1</b>                                       | 9  |
| Figure S10. <sup>1</sup> H NMR spectra of <b>L1-Cd(II)</b> complex                     | 10 |
| Figure S11. <sup>13</sup> C NMR spectra of <b>L1-Cd(II)</b> complex                    | 11 |
| Figure S12. XRD structure of <b>L1-Cd(II)</b> complex                                  | 12 |
| Table S1. Details of bond angles                                                       | 13 |
| Table S2. Details of bond lengths                                                      | 14 |

**Figure S1.** Fluorescence spectra of **L1** (10  $\mu\text{M}$ ) in  $\text{CH}_3\text{CN}$  in the presence of various metal ions (50  $\mu\text{M}$ ): (1)  $\text{Ni}^+$ ; (2)  $\text{Mn}^{2+}$ ; (3)  $\text{Cu}^{2+}$ ; (4)  $\text{Fe}^{3+}$ ; (5)  $\text{Co}^{2+}$ ; (6)  $\text{Ag}^+$ ; (7)  $\text{Ca}^{2+}$ ; (8)  $\text{Na}^+$ ; (9)  $\text{K}^+$ ; (10)  $\text{Li}^+$ ; (11)  $\text{Zn}^{2+}$ ; (12)  $\text{Cd}^{2+}$ ; (13)  $\text{Al}^{3+}$ ; (14) Host.

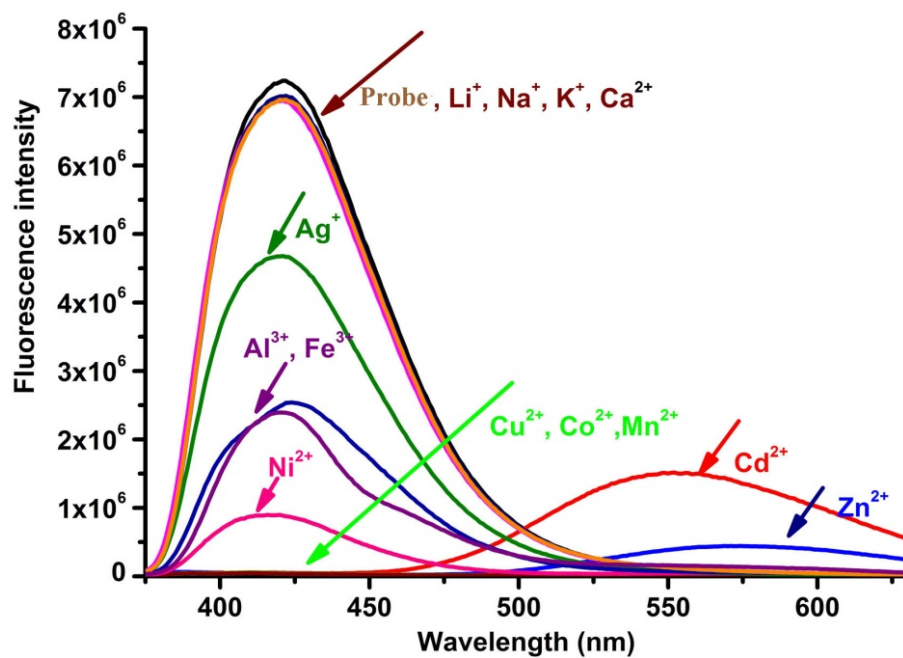

**Figure S2.** Structure of **L1-Cd(II)** complex and Mass spectrometry (HRMS) of **L1-Cd(II)** complex

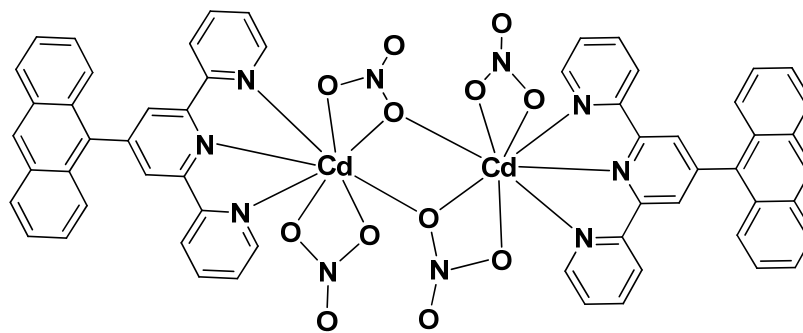

13:52:24

140605\_JSY\_1.5 (0.086) AM (Cen: 4.80.00, A: 100000.0, 0.00, 0.70); Sm (SG: 2x3.00); Cm (5:59)

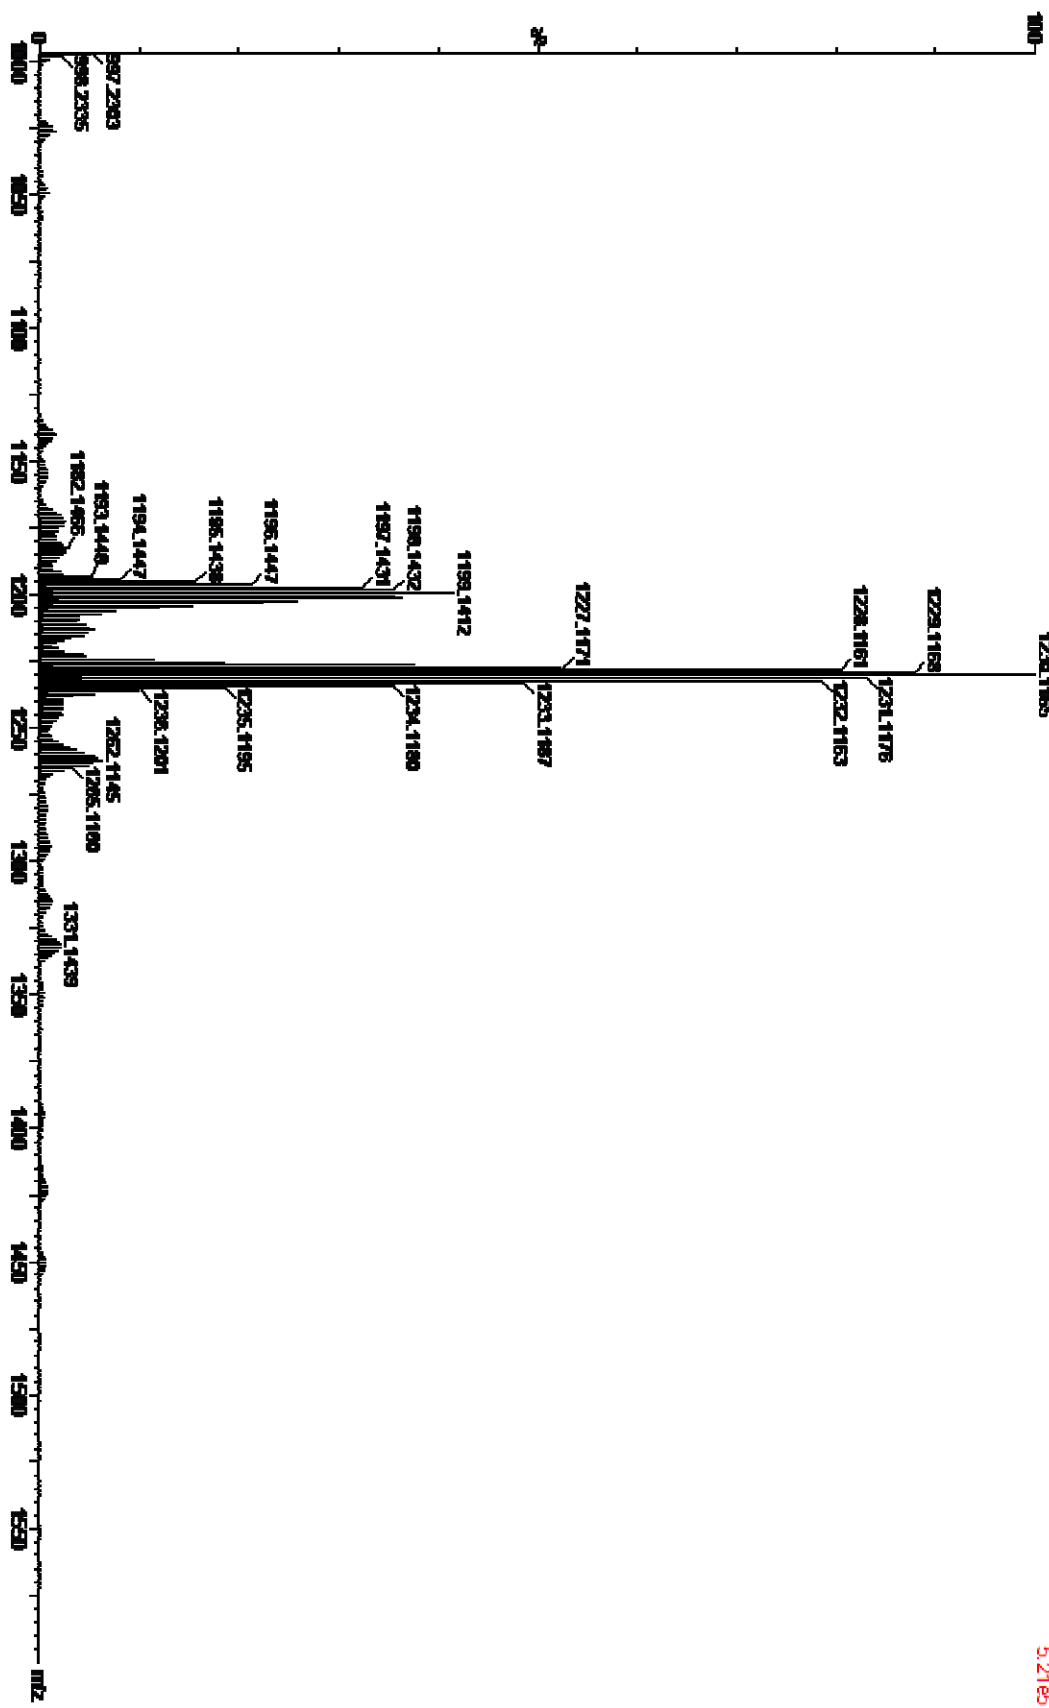

06 Jun 2014

TOF MS ES+

5.2165

**Figure S3.** Absorption spectra of L1(10  $\mu$ M) titration of  $\text{Cd}^{2+}$

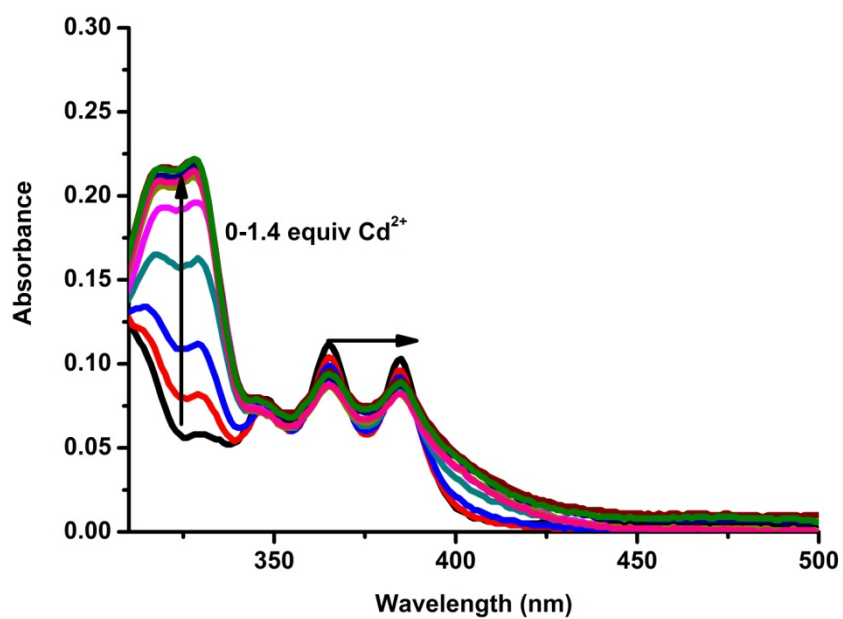

**Figure S4.** The determination L1-Cd(II) complex of the detection limit (LOD) for PPI

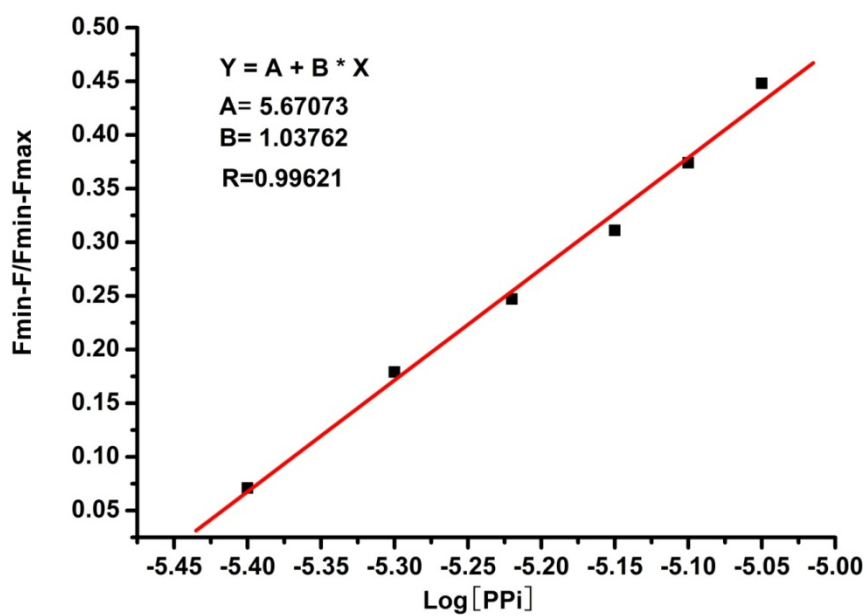

Figure S5. Mass spectral analysis for L1-Cd(II) interaction with PPI

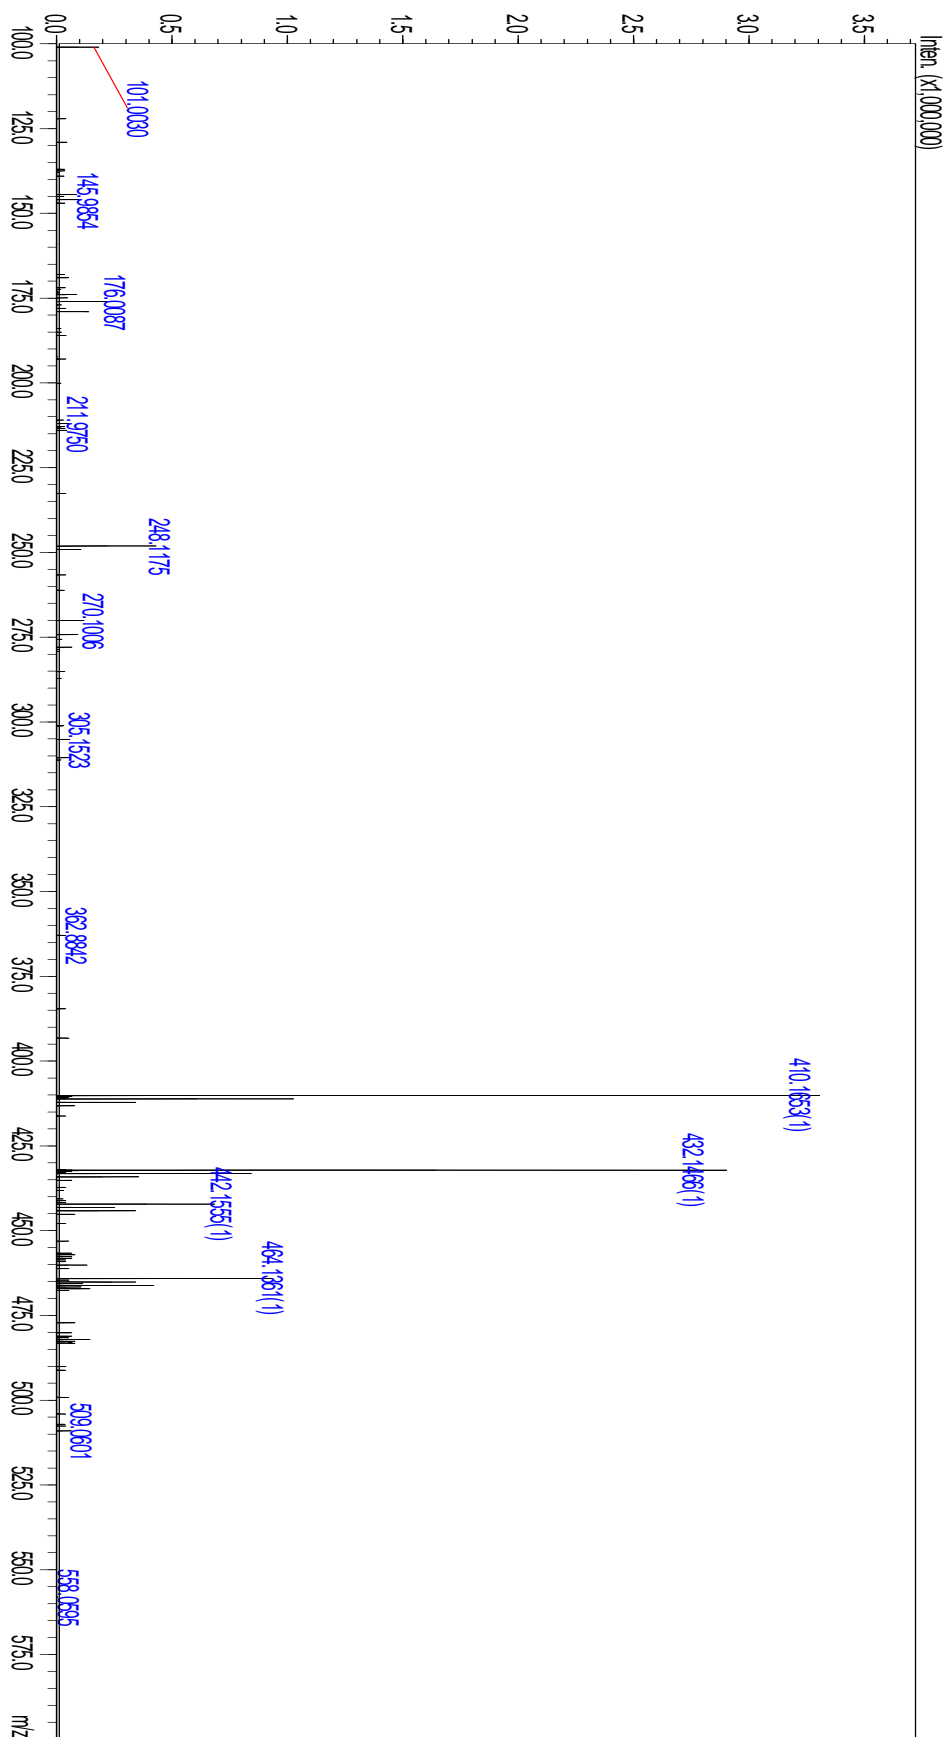

**Figure S6.** Absorption spectra of **L1** (10  $\mu\text{M}$ ), **L1-Cd(II)** complex(10  $\mu\text{M}$ ), and **L1-Cd(II)** complex (10  $\mu\text{M}$ ) with **PPi** (10  $\mu\text{M}$ )

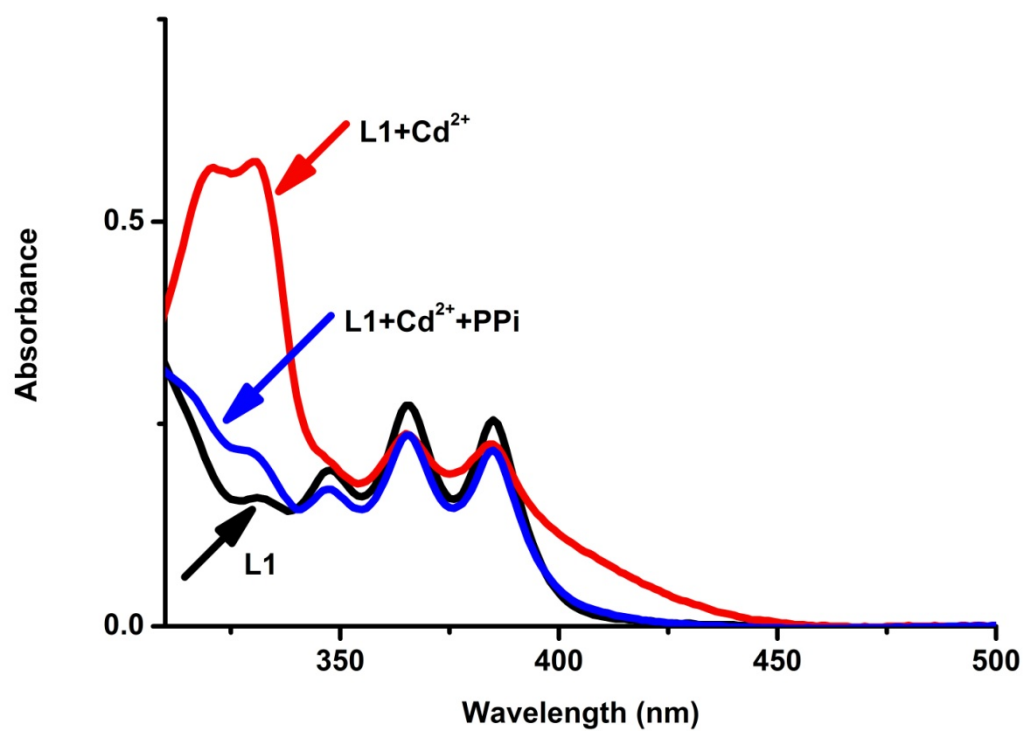

Figure S7. <sup>1</sup>H NMR spectra of L1

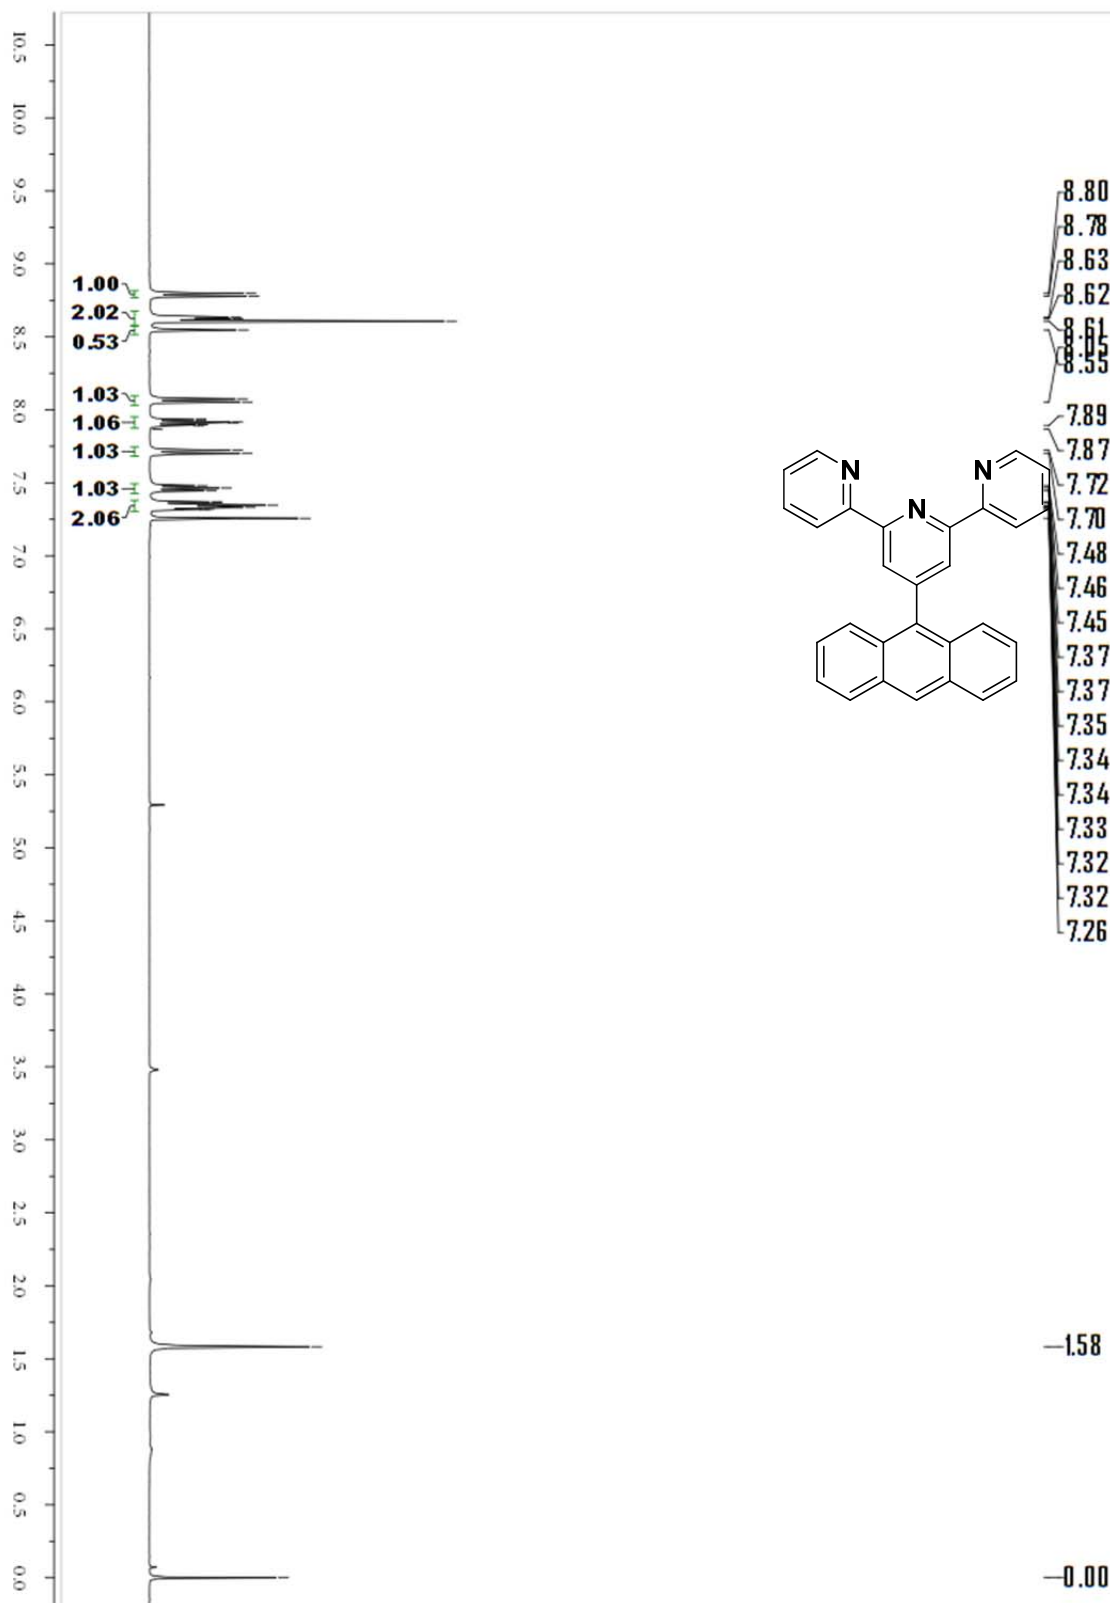



**Figure S8.**  $^{13}\text{C}$  NMR spectra of **L1**

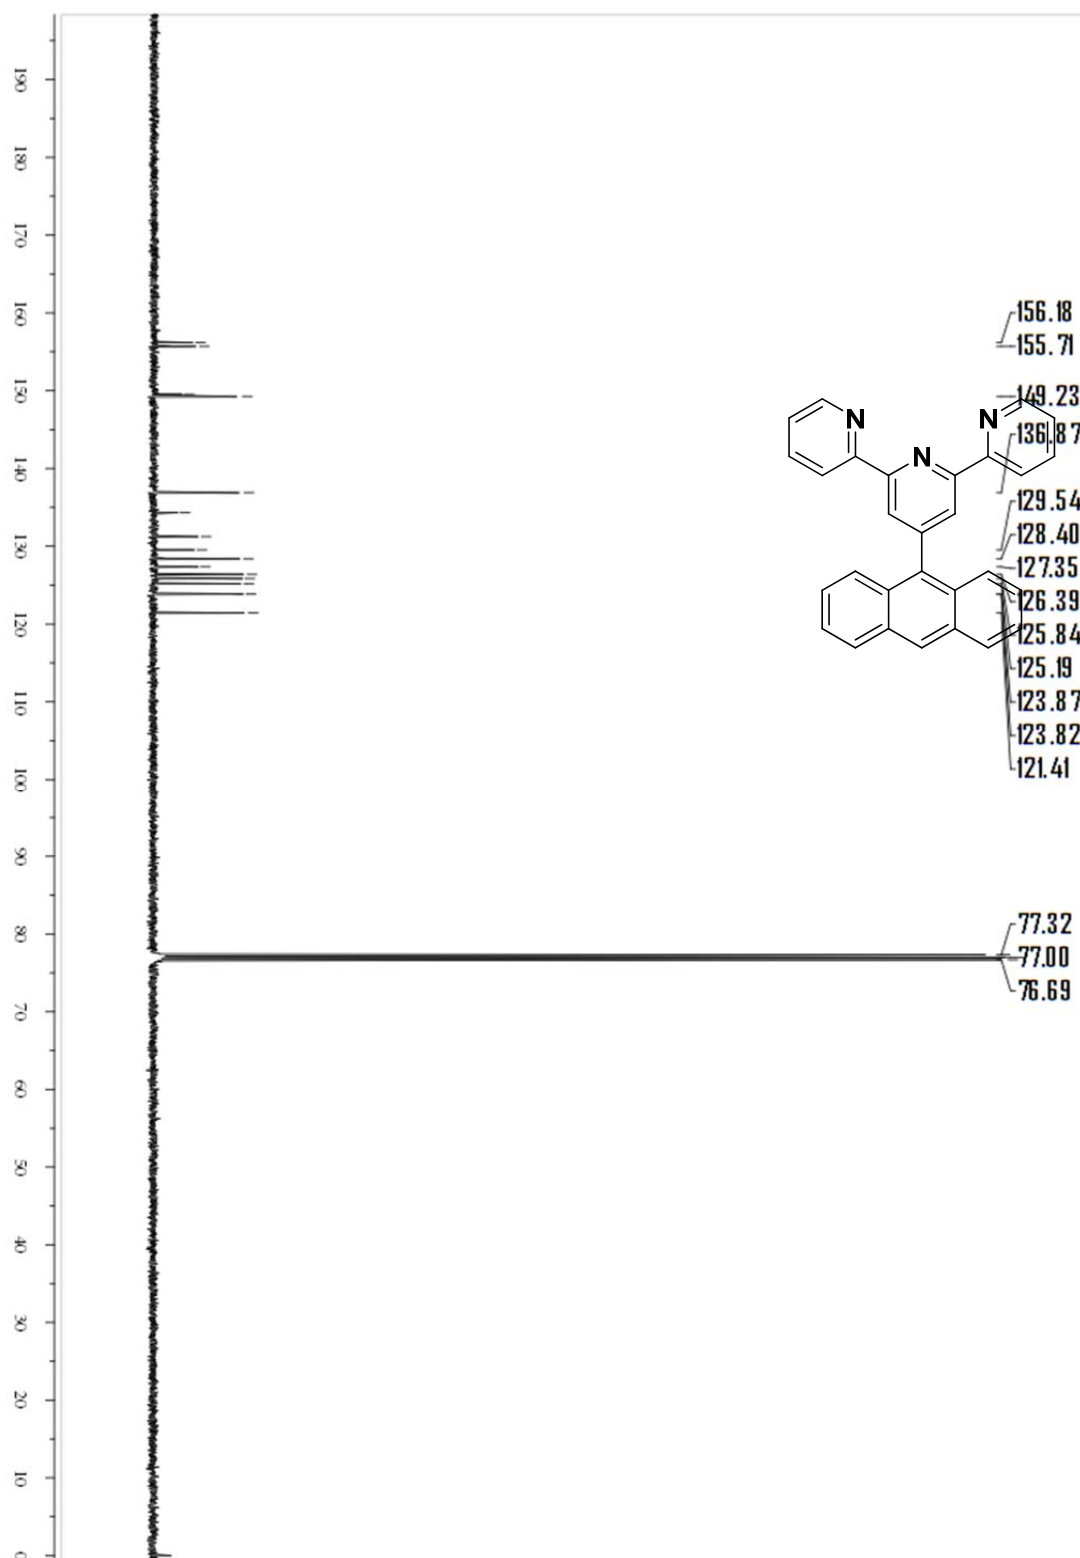

**Figure S9.** Mass spectrometry (HRMS) of **L1**

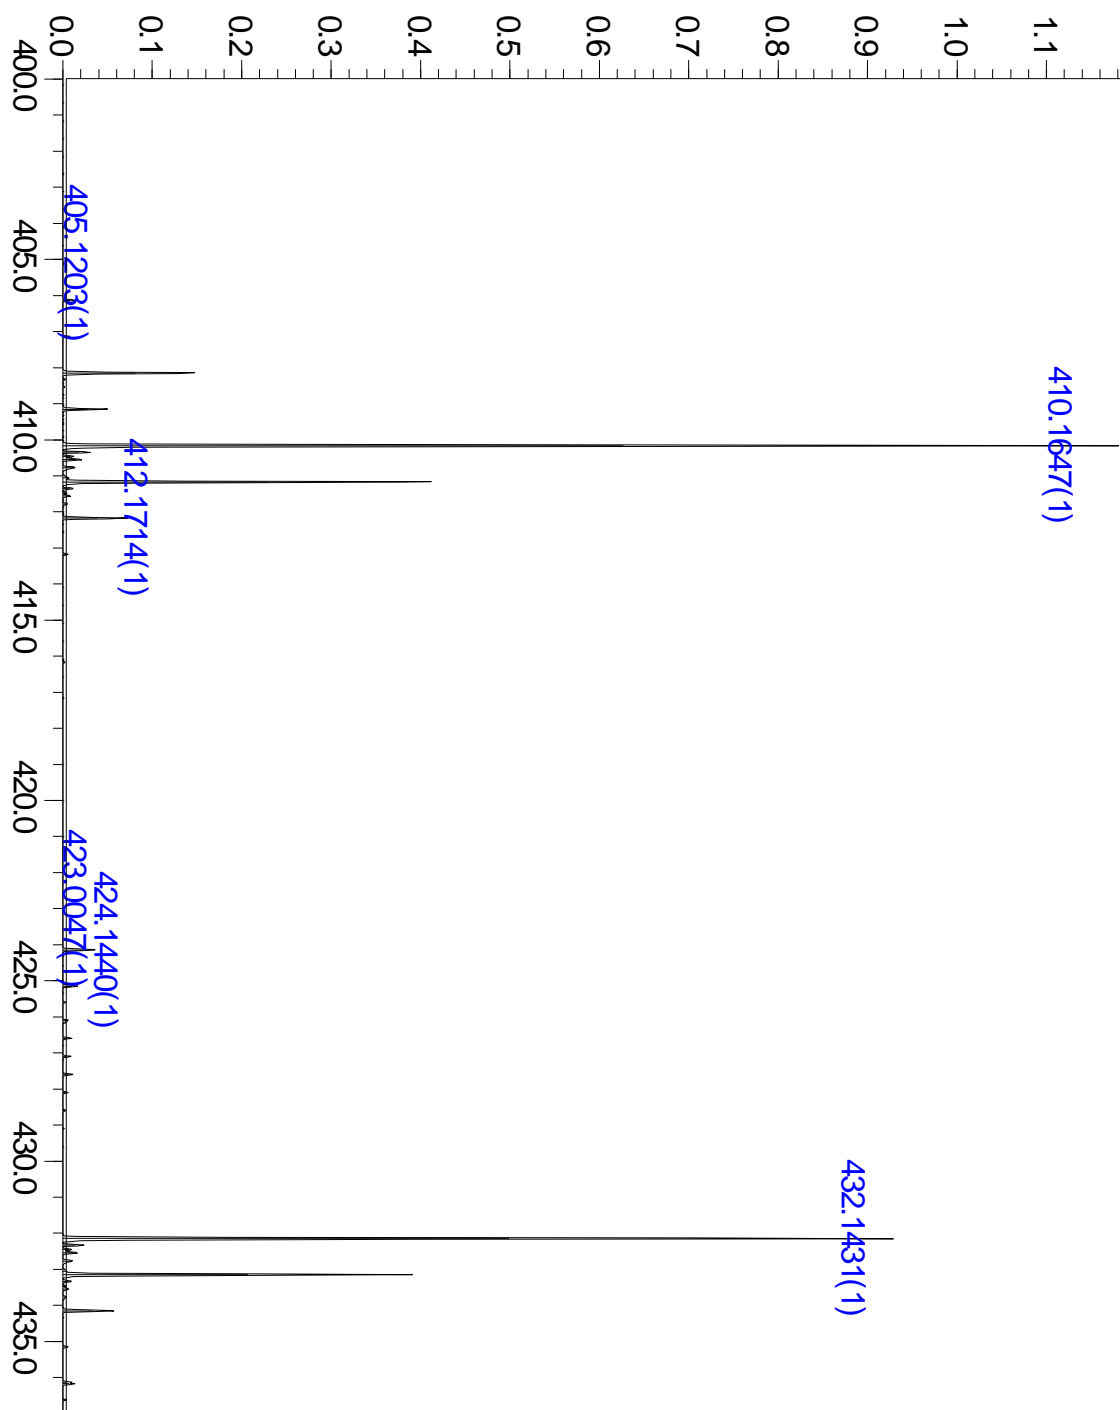

Figure S10.  $^1\text{H}$  NMR spectra of L1-Cd(II) complex

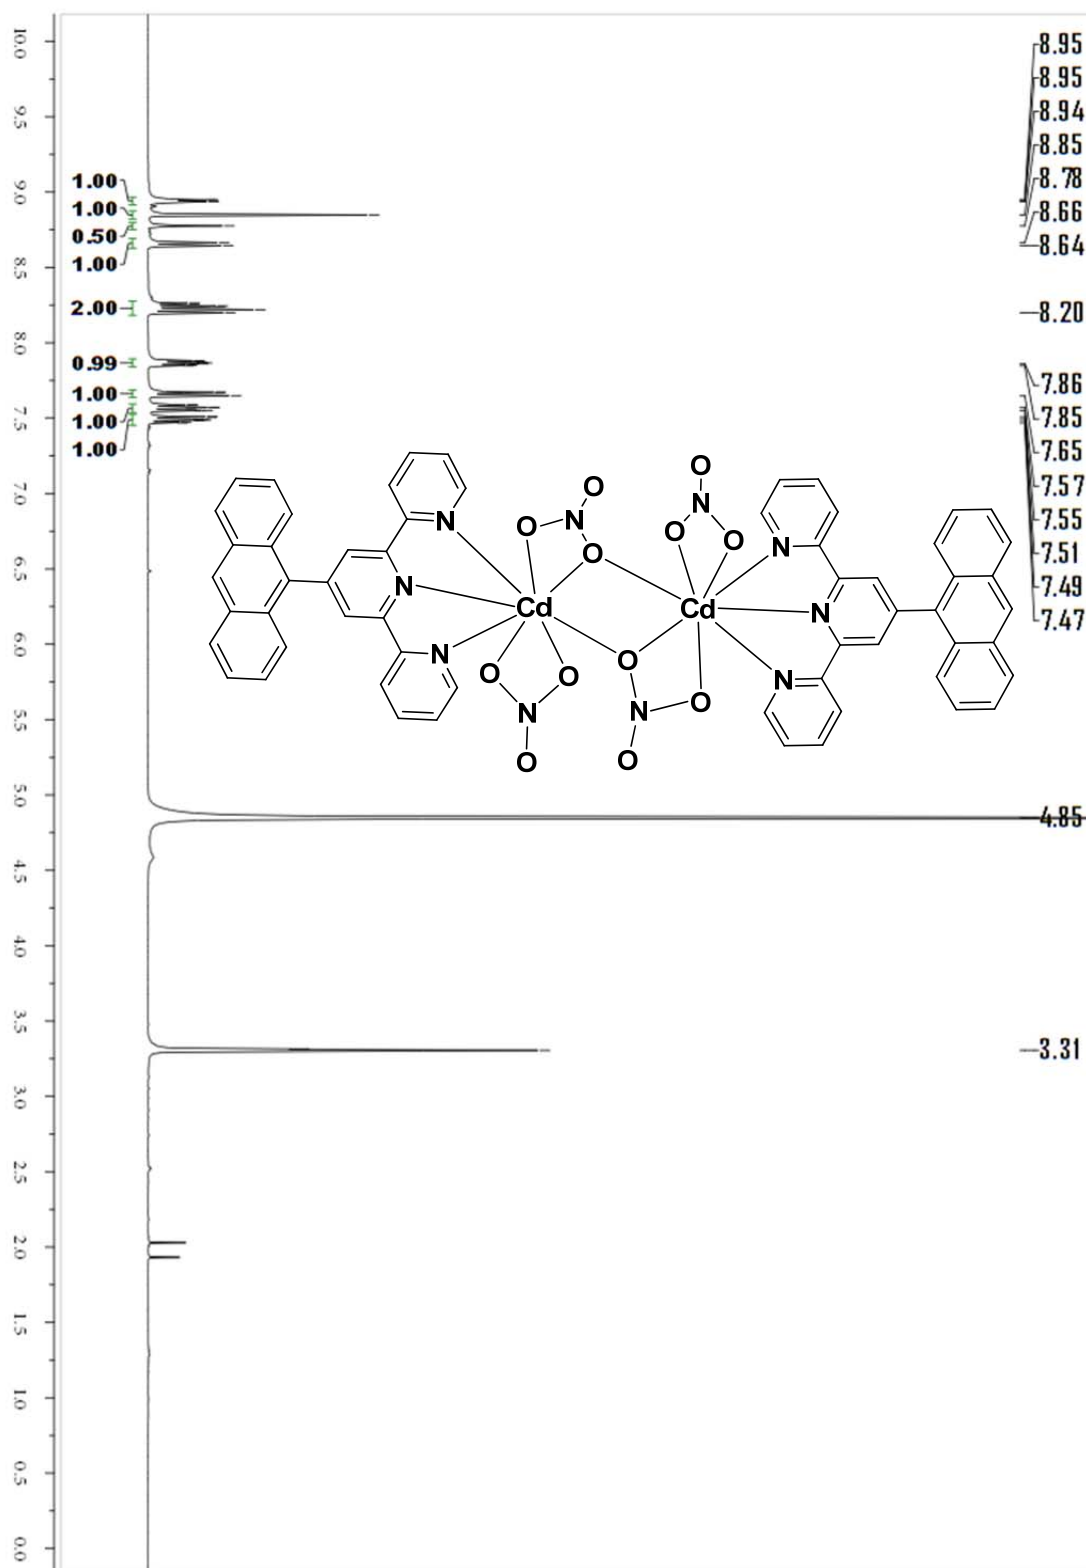

Figure S11.  $^{13}\text{C}$  NMR spectra of L1-Cd(II) complex

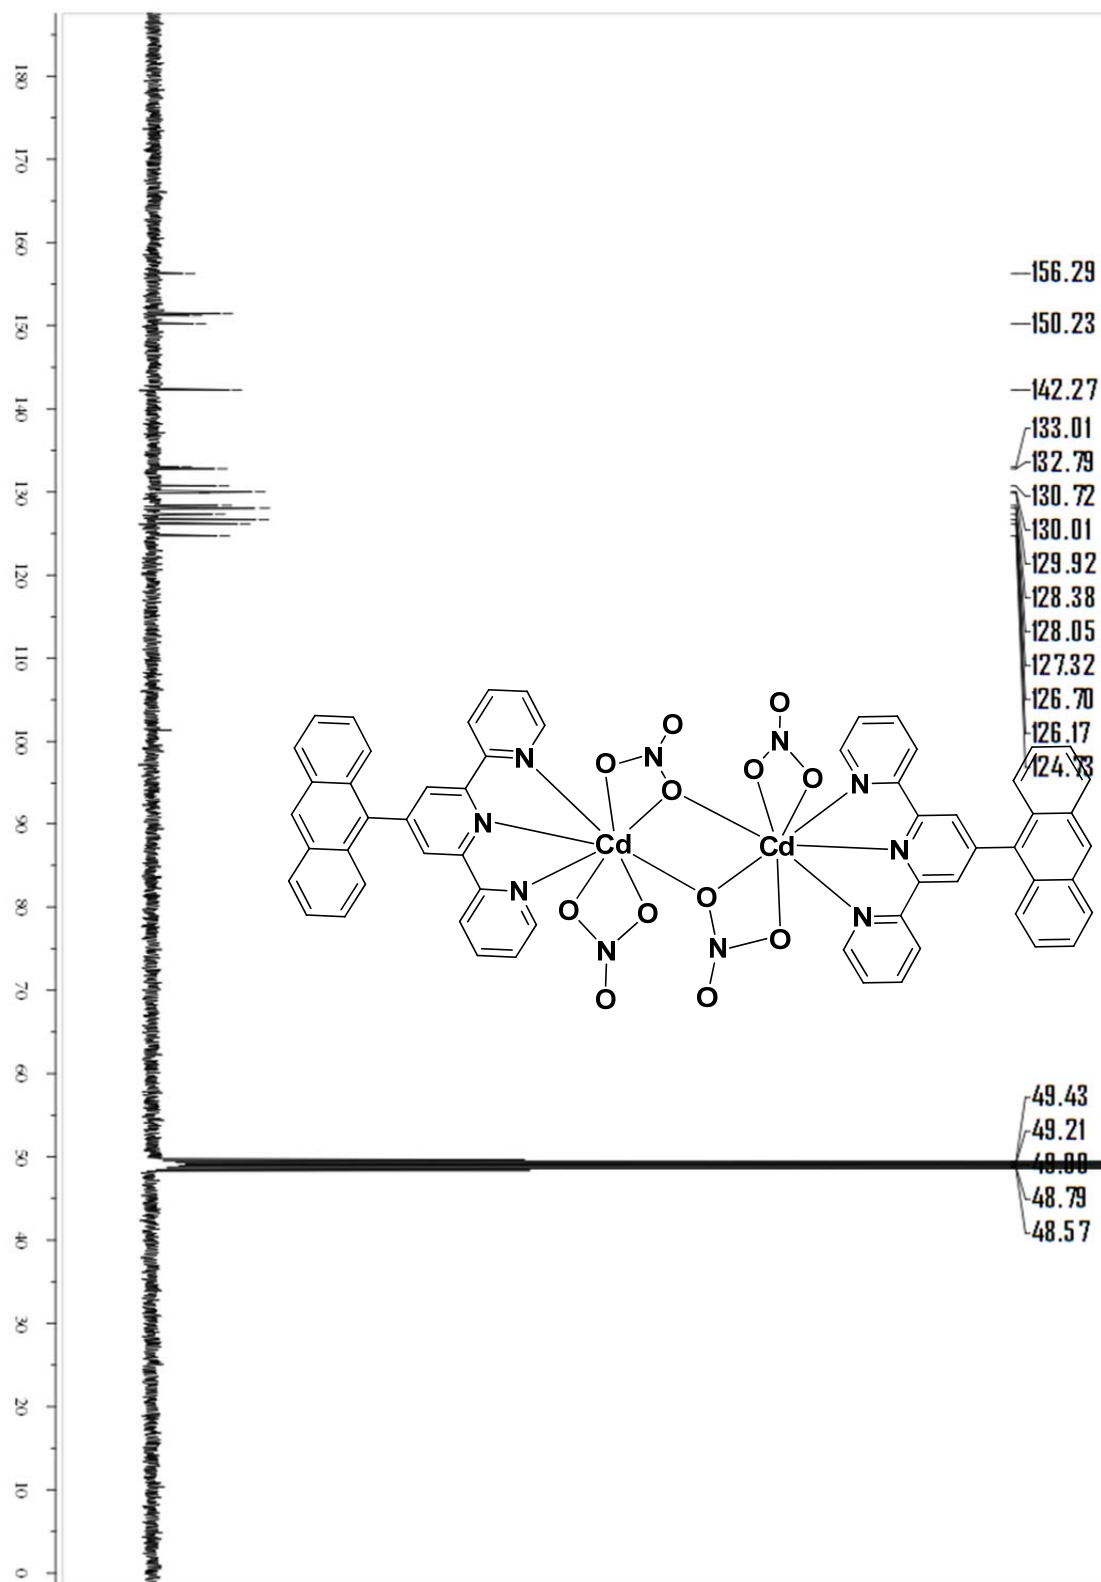

**Figure S12.** XRD structure of **L1-Cd(II)** complex, details of band angles, bond lengths

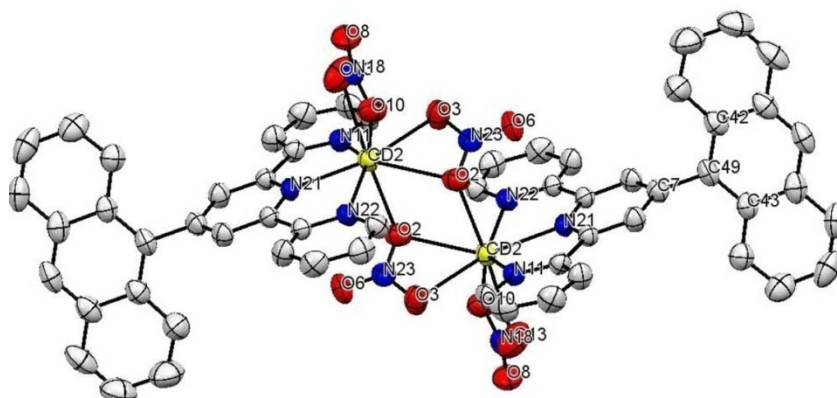

**Table S1.** Bond Lengths for L1-Cd(II) complex.

| Atom | Atom             | Length/Å | Atom | Atom | Length/Å  |
|------|------------------|----------|------|------|-----------|
| Cd2  | O2 <sup>1</sup>  | 2.544(4) | C44  | C9   | 1.391(9)  |
| Cd2  | O2               | 2.591(3) | C44  | C25  | 1.363(7)  |
| Cd2  | O3 <sup>1</sup>  | 2.352(3) | C46  | C43  | 1.422(7)  |
| Cd2  | O10              | 2.462(4) | C46  | C47  | 1.402(8)  |
| Cd2  | O13              | 2.504(4) | N11  | C6   | 1.331(6)  |
| Cd2  | N21              | 2.311(3) | N11  | C29  | 1.335(6)  |
| Cd2  | N22              | 2.359(3) | C43  | C25  | 1.419(7)  |
| Cd2  | N11              | 2.363(3) | C47  | C12  | 1.370(8)  |
| O2   | Cd2 <sup>1</sup> | 2.544(4) | C48  | C33  | 1.365(9)  |
| O2   | N23              | 1.256(5) | C1   | C6   | 1.505(6)  |
| O3   | Cd2 <sup>1</sup> | 2.352(3) | C1   | C20  | 1.367(6)  |
| O3   | N23              | 1.274(5) | C4   | C18  | 1.373(7)  |
| O6   | N23              | 1.214(5) | C6   | C13  | 1.391(6)  |
| O8   | N18              | 1.210(5) | C7   | C16  | 1.378(6)  |
| O10  | N18              | 1.246(5) | C7   | C20  | 1.399(6)  |
| O13  | N18              | 1.242(6) | C12  | C22  | 1.426(8)  |
| N21  | C1               | 1.339(5) | C13  | C40  | 1.377(6)  |
| N21  | C38              | 1.335(5) | C16  | C38  | 1.377(6)  |
| N22  | C4               | 1.348(6) | C18  | C24  | 1.360(7)  |
| N22  | C35              | 1.331(5) | C22  | C41  | 1.339(9)  |
| C45  | C46              | 1.418(8) | C24  | C32  | 1.369(7)  |
| C45  | C9               | 1.352(9) | C27  | C29  | 1.378(7)  |
| C49  | C42              | 1.404(7) | C27  | C40  | 1.354(7)  |
| C49  | C43              | 1.410(6) | C32  | C35  | 1.385(6)  |
| C49  | C7               | 1.499(6) | C33  | C41  | 1.409(10) |
| C42  | C48              | 1.426(7) | C35  | C38  | 1.505(6)  |

Table S2. Bond Angles for L1-Cd(II) complex.

| Atom             | Atom | Atom             | Angle/°    | Atom | Atom | Atom | Angle/°  |
|------------------|------|------------------|------------|------|------|------|----------|
| O2 <sup>1</sup>  | Cd2  | O2               | 69.48(13)  | C48  | C42  | C12  | 117.4(5) |
| O3 <sup>1</sup>  | Cd2  | O2               | 92.88(12)  | C25  | C44  | C9   | 120.5(6) |
| O3 <sup>1</sup>  | Cd2  | O2 <sup>1</sup>  | 51.92(11)  | C45  | C46  | C43  | 118.7(5) |
| O3 <sup>1</sup>  | Cd2  | O10              | 81.05(13)  | C47  | C46  | C45  | 121.6(5) |
| O3 <sup>1</sup>  | Cd2  | O13              | 77.49(15)  | C47  | C46  | C43  | 119.7(5) |
| O3 <sup>1</sup>  | Cd2  | N22              | 134.02(12) | C6   | N11  | Cd2  | 117.4(3) |
| O3 <sup>1</sup>  | Cd2  | N11              | 86.94(12)  | C6   | N11  | C29  | 118.4(4) |
| O10              | Cd2  | O2               | 149.37(12) | C29  | N11  | Cd2  | 124.3(3) |
| O10              | Cd2  | O2 <sup>1</sup>  | 83.58(11)  | C49  | C43  | C46  | 118.7(4) |
| O10              | Cd2  | O13              | 50.23(12)  | C49  | C43  | C25  | 123.2(4) |
| O13              | Cd2  | O2               | 157.21(13) | C25  | C43  | C46  | 118.1(4) |
| O13              | Cd2  | O2 <sup>1</sup>  | 117.02(13) | C12  | C47  | C46  | 121.9(5) |
| N21              | Cd2  | O2 <sup>1</sup>  | 147.04(11) | O8   | N18  | O10  | 121.0(4) |
| N21              | Cd2  | O2               | 87.24(11)  | O8   | N18  | O13  | 123.0(5) |
| N21              | Cd2  | O3 <sup>1</sup>  | 156.53(12) | O13  | N18  | O10  | 115.9(4) |
| N21              | Cd2  | O10              | 110.02(12) | C33  | C48  | C42  | 120.6(6) |
| N21              | Cd2  | O13              | 93.56(14)  | N21  | C1   | C6   | 115.4(3) |
| N21              | Cd2  | N22              | 69.45(11)  | N21  | C1   | C20  | 121.3(4) |
| N21              | Cd2  | N11              | 70.05(11)  | C20  | C1   | C6   | 123.2(4) |
| N22              | Cd2  | O2 <sup>1</sup>  | 86.00(11)  | N22  | C4   | C18  | 122.8(5) |
| N22              | Cd2  | O2               | 87.48(11)  | N11  | C6   | C1   | 117.0(4) |
| N22              | Cd2  | O10              | 76.04(12)  | N11  | C6   | C13  | 121.1(4) |
| N22              | Cd2  | O13              | 114.14(13) | C13  | C6   | C1   | 121.9(4) |
| N22              | Cd2  | N11              | 137.65(12) | C16  | C7   | C49  | 121.6(4) |
| N11              | Cd2  | O2               | 78.73(11)  | C16  | C7   | C20  | 117.9(4) |
| N11              | Cd2  | O2 <sup>1</sup>  | 124.39(11) | C20  | C7   | C49  | 120.5(4) |
| N11              | Cd2  | O10              | 130.34(12) | C45  | C9   | C44  | 120.5(5) |
| N11              | Cd2  | O13              | 80.15(12)  | C47  | C12  | C42  | 119.4(5) |
| Cd2 <sup>1</sup> | O2   | Cd2              | 110.52(13) | C47  | C12  | C22  | 121.7(5) |
| N23              | O2   | Cd2 <sup>1</sup> | 91.3(3)    | C22  | C12  | C42  | 118.9(5) |
| N23              | O2   | Cd2              | 112.6(2)   | C40  | C13  | C6   | 119.5(4) |
| N23              | O3   | Cd2 <sup>1</sup> | 100.0(3)   | C38  | C16  | C7   | 119.7(4) |
| N18              | O10  | Cd2              | 97.9(3)    | C24  | C18  | C4   | 119.0(4) |
| O2               | N23  | O3               | 116.4(4)   | C1   | C20  | C7   | 119.6(4) |
| O6               | N23  | O2               | 123.3(4)   | C41  | C22  | C12  | 121.9(6) |
| O6               | N23  | O3               | 120.3(4)   | C18  | C24  | C32  | 119.1(4) |
| N18              | O13  | Cd2              | 96.0(3)    | C44  | C25  | C43  | 121.0(5) |
| C1               | N21  | Cd2              | 119.8(3)   | C40  | C27  | C29  | 118.3(4) |
| C38              | N21  | Cd2              | 120.3(3)   | N11  | C29  | C27  | 123.4(5) |

|     |     |     |          |     |     |     |          |
|-----|-----|-----|----------|-----|-----|-----|----------|
| C38 | N21 | C1  | 119.9(3) | C24 | C32 | C35 | 119.3(5) |
| C4  | N22 | Cd2 | 123.6(3) | C48 | C33 | C41 | 121.6(6) |
| C35 | N22 | Cd2 | 117.8(3) | N22 | C35 | C32 | 122.1(4) |
| C35 | N22 | C4  | 117.6(4) | N22 | C35 | C38 | 116.0(3) |
| C9  | C45 | C46 | 121.1(5) | C32 | C35 | C38 | 121.8(4) |
| C42 | C49 | C43 | 121.1(4) | N21 | C38 | C16 | 121.4(4) |
| C42 | C49 | C7  | 119.4(4) | N21 | C38 | C35 | 115.1(3) |
| C43 | C49 | C7  | 119.5(4) | C16 | C38 | C35 | 123.4(4) |
| C49 | C42 | C48 | 123.4(5) | C27 | C40 | C13 | 119.3(4) |
| C49 | C42 | C12 | 119.1(4) | C22 | C41 | C33 | 119.6(6) |

---
